# Supplementary material
Source: MDPI journal article supplement (https://www.mdpi.com/1999-4893/9/4/70)
Supplement: s1 [file s1]

# Supplementary Materials: Plant Electrical Signal Classification Based on Waveform Similarity

Yang Chen, Dong-Jie Zhao, Zi-Yang Wang, Zhong-Yi Wang, Guiliang Tang and Lan Huang

## Inventory of Supplementary Information

Supplementary Note: Supplementary Note 1

Supplementary Figure: Figure S1

## Supplementary References

## Supplementary Note

### Note 1

A copy of the source code is available upon request by sending an email to [yancychy@163.com](mailto:yancychy@163.com).

## Supplementary Figure

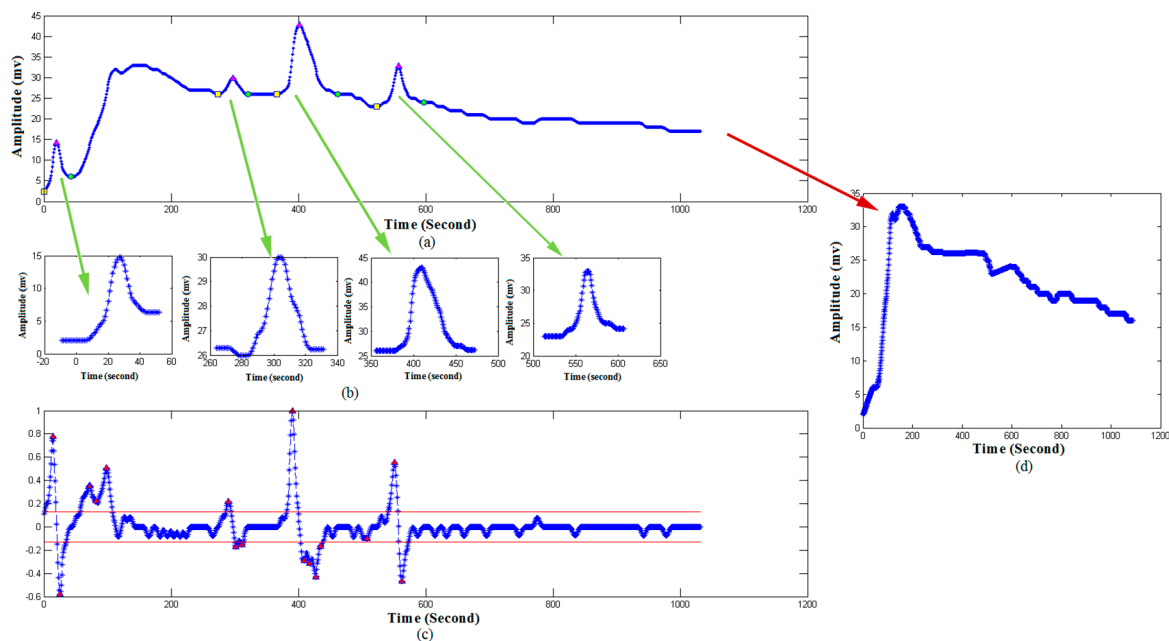

**Figure S1.** APs extracted from composite signals involving both APs and VPs induced by burning stimuli. (a) The raw signal is from literatures [1]. (b) Peaks extracted from (a). (c) Derivative signal for (a). (d) The rest of separated signal.

## References

1. Stankovic, B.; Witters, D.L.; Zawadzki, T.; Davies, E. Action potentials and variation potentials in sunflower: An analysis of their relationship and distinguishing characteristics. *Physiol. Plant.* **1998**, *103*, 51–58.
